# Supplementary material
Source: PubMed Central journal article supplement (PMC4135755)
Supplement: AEM.01021-14_zam999105563so1.pdf [file AEM.01021-14_zam999105563so1.pdf]

**Table S1.** Strains used in this study

| Year of isolation | Number of strains/Strain | Accession    | Serogroup   | Country/Province(s)(n)                         | Source  | <i>ctxB</i> * |
|-------------------|--------------------------|--------------|-------------|------------------------------------------------|---------|---------------|
| This study        |                          |              |             |                                                |         |               |
| 2001              | 1                        | -            | Non-O1/O139 | Guangdong(1)                                   | Water   | -             |
| 2002              | 1                        | -            | Non-O1/O139 | Fujian(1)                                      | Water   | -             |
| 2003              | 2                        | -            | Non-O1/O139 | Chongqing(2)                                   | Water   | -             |
| 2005              | 1                        | -            | Non-O1/O139 | Guangdong(1)                                   | Water   | -             |
| 2006              | 51                       | -            | Non-O1/O139 | Fujian(7),Liaoning(2),Guangdong(41),Jiangxi(1) | Water   | -             |
| 2007              | 57                       | -            | Non-O1/O139 | Fujian(7),Liaoning(10),Guangdong(40)           | Water   | -             |
| 2008              | 102                      | -            | Non-O1/O139 | Fujian(4),Liaoning(40),Guangdong(55),Hainan(3) | Water   | -             |
| 2008              | 1                        | -            | Non-O1/O139 | Sichuan(1)                                     | Water   | +             |
| 2009              | 76                       | -            | Non-O1/O139 | Guangdong(76)                                  | Water   | -             |
| 2010              | 3                        | -            | Non-O1/O139 | Zhejiang(2),Shandong(1)                        | Water   | -             |
| 2001              | 1                        | -            | O139        | Jiangxi(1)                                     | Water   | -             |
| 2002              | 1                        | -            | O139        | Guangdong(1)                                   | Water   | -             |
| 2005              | 2                        | -            | O139        | Jiangxi(1),Jiangsu(1)                          | Water   | -             |
| 2006              | 2                        | -            | O139        | Jiangxi(1),Guangdong(1)                        | Water   | -             |
| 2008              | 2                        | -            | O139        | Jiangxi(2)                                     | Water   | -             |
| Reference strains |                          |              |             |                                                |         |               |
| 1910              | NCTC_8457(ATCC14033)     | AAWD00000000 | O1          | Saudi Arabia                                   | Unknown | -             |
| 1937              | M66-2                    | NC_012578    | O1          | Indonesia                                      | Unknown | -             |
| 1965              | O395                     | NC_012582    | O1          | India                                          | Unknown | +             |
| 1968              | V52                      | AAKJ00000000 | O37         | Sudan                                          | Patient | +             |
| 1975              | N16961                   | NC_002505    | O1          | Bangladesh                                     | Unknown | +             |

|         |             |                 |          |                       |                                |   |
|---------|-------------|-----------------|----------|-----------------------|--------------------------------|---|
| 1978    | 116063      | NZ_APFK00000000 | O1       | Brazil                | Patient                        | - |
| 1980    | 2740-80     | AAUT00000000    | O1       | United States         | Water                          | - |
| 1980    | TM_11079-80 | ACHW00000000    | O1 Ogawa | Brazil                | Sewage                         | - |
| 1985    | 12129(1)    | ACFQ00000000    | O1 Inaba | Australia             | Water                          | - |
| 1987    | V51         | AAKI00000000    | O141     | USA                   | Patient                        | + |
| 1991    | Amazonia    | AFSV00000000    | O1       | Brazil                | Patient                        | - |
| 1993    | 4260B       | NZ_AMVL00000000 | O139     | Bangladesh            | Patient                        | + |
| 2001    | G4222       | NZ_ANNB00000000 | O1       | South Africa: Gauteng | Patient                        | - |
| 2001    | MZO-2       | AAWF00000000    | O14      | Bangladesh            | Patient                        | - |
| 2001    | AM-19226    | AATY00000000    | O39      | Bangladesh            | Patient                        | - |
| 2001    | MZO-3       | AAUU00000000    | O37      | Bangladesh            | Patient                        | - |
| 2004    | VC35        | AMBR00000000    | O1       | Malaysia              | Patient                        | - |
| 2010    | NHCC-008D   | NZ_APGC00000000 | O1       | Bangladesh            | Patient                        | - |
| 2011    | EM-1676A    | NZ_APFY00000000 | O1       | Bangladesh            | Water                          | - |
| Unknown | LMA3984-4   | NC_017270       | O1       | Brazil                | Water                          | - |
| Unknown | PS15        | AJIR00000000    | O106     | USA                   | Sediment in Puget Sound,<br>WA | - |

\* +, positive; -, negative

Table S2. PCR primers used in this study

| Primer                          | Nucleotide sequence (5' to 3') | Amplicon size (bp) | Reference  |
|---------------------------------|--------------------------------|--------------------|------------|
| <i>ctxB</i> -F                  | GCCGGGTTGTGGGAATGCTCCAAG       | 536                | 1          |
| <i>ctxB</i> -R                  | CATGCGATTGCCGCAATTAGTATGGC     |                    |            |
| <i>rstR</i> <sup>ET</sup> -F    | GAGCTAAAATACAGCAACCAATGC       | 487                | 2          |
| <i>rstR</i> <sup>ET</sup> -R    | ACTCACCTTGTATTTCG              |                    |            |
| <i>rstR</i> <sup>class</sup> -F | TATTGGGATTGTAAACAGCTGTCC       | 480                | 3          |
| <i>rstR</i> <sup>class</sup> -R | ACTCACCTTGTATTTCG              |                    |            |
| <i>rstR</i> <sup>calc</sup> -F  | TAGCGCGCCATGTTTGAGCG           | 456                | 4          |
| <i>rstR</i> <sup>calc</sup> -R  | GGACTCAAGGGGAGCTAGCCGAA        |                    |            |
| <i>rstR</i> -4** <sup>-</sup> F | GCGGAAACTTTAAATACTTAG          | 339                | 5          |
| <i>rstR</i> -4** <sup>-</sup> R | CTGTTTTGTCGCTGAAAACTTTG        |                    |            |
| <i>rstR</i> -5-F                | CATGCTGTAAATACACATGCACGC       | 312                | 5          |
| <i>rstR</i> -5-R                | GCGAGTTTCACTCTAAC              |                    |            |
| <i>rstR</i> 6-F                 | CCGATTTGAATTCAAGTATGCAA        | 362                | 6          |
| <i>rstR</i> 6-R                 | GCACTCACCTTGTATTTCG            |                    |            |
| <i>rstR</i> 232-F               | CACTTTTTGACCGCGAAGCG           | 649                | 7          |
| <i>rstR</i> 232-R               | ATGCGTCCCAACGAATGGAA           |                    |            |
| <i>rstR</i> -18F                | TAGCGTGCGGAGTCGCGTTG           | 557                | 8          |
| <i>rstR</i> -18R                | CCGTTCAAACGCCATGCACCA          |                    |            |
| <i>tcpA</i> 72F                 | CACGATAAGAAA ACCGGTCAAGAG      | 451 (El Tor)       | 9          |
| <i>tcpA</i> 477R                | CGAAAGCACCTTCTTTACGTTG         |                    |            |
| <i>tcpA</i> 647R                | TTA CCAAATGCA ACGCCGAATG       | 620 (Classical)    |            |
| <i>tcpA</i> 1185-F              | TGCTGTCCGTGTCGCACCAG           | 1185               | this study |
| <i>tcpA</i> 1185-R              | CGGCAGAGGCCAAAATCGCCT          |                    |            |
| VSP-I                           |                                |                    |            |
| VC0175F                         | TGGATGCTCTCTTCTTCA             | 2834               |            |
| VC0175R                         | CGCTCACTCACTAATACCGAG          |                    |            |
| VC0178F                         | AGAGGCTTGTTTACTATCAG           | 2053               |            |
| VC0178R                         | ATCGGTACTGTCAGGGCT             |                    |            |
| VC0180F                         | GGATGAGCAAATACAGCTAAC          | 2283               | 10         |
| VC0180R                         | CTAGGAAGAATTTTATCGGC           |                    |            |
| VC0183F                         | CAGTAAGAGTGTAGCGTGCC           | 3389               |            |
| VC0183R                         | CCTGCACATCGAGATGC              |                    |            |

|                                    |                              |      |    |
|------------------------------------|------------------------------|------|----|
| VC0185F                            | AGGAGGCGTGTAAGTCATAGC        | 1110 |    |
| VC0185R                            | AGACCACGAATACCTGCTCC         |      |    |
| VSP-II                             |                              |      |    |
| VC0490F                            | CGTGAAGGGATATAGGAG           | 2337 |    |
| VC0490R                            | TGCAGTTGTTGAATGGAC           |      |    |
| VC0493F                            | AATGCTTCTCAGGGGGTCTT         | 3600 |    |
| VC0493R                            | CGCTCTTCTTTCCACGCTTCA        |      |    |
| VC0498F                            | AGGTGGTATCGGGCTGGT           | 4140 |    |
| VC0498R                            | TGCGGCTGGAATGGAGTCTG         |      |    |
| VC0502F                            | TCATCAGTTAGCACACGAAC         | 476  |    |
| VC0502R                            | GCTATCGTTATACTTGGCG          |      |    |
| VC0504F                            | CAGCAAAGGCGGAAGAGGTAG        | 3240 | 10 |
| VC0504R                            | AGCCCGAAATGAATCCCAAAA        |      |    |
| VC0512F                            | CAGTGGCTTCGCAGAGGA           | 3900 |    |
| VC0512R                            | CCCTCCACTGCTATTCCG           |      |    |
| VC0514F                            | TTATGATCCAAGGAGTAGGG         | 2089 |    |
| VC0514R                            | AGGCTGAAAAACAACCTTGAG        |      |    |
| VC0516F                            | GTTTTCTGCGTTGTTTCGAG         | 965  |    |
| VC0516R                            | TCCTGATGTCTCTCTTGCCG         |      |    |
| VC0517F                            | CCCACTTCTTCCAGAGTATG         | 1753 |    |
| VC0517R                            | CGCAGTCACAGCTTAAACAAC        |      |    |
| Putative accessory virulence genes |                              |      |    |
| TTSS(vcsV2)-F                      | ATGCAGATCTTTTGGCTCACTTGATGGG | 742  |    |
| TTSS(vcsV2)-R                      | ATGCGTCGACGCCACATCATTGCTTGCT |      | 11 |
| IS1004-F                           | ATTGTCATCCCTAAACCACC         | 603  |    |
| IS1004-R                           | AGGCGGTTTTAATATAAGCC         |      |    |
| ST-F                               | TATTATTTTCTTCAATCGCATTTAGC   | 206  | 12 |
| ST-R                               | ATTTAAACATCCAAAGCAAGCTGG     |      |    |
| <i>hlyA</i> -CL-F                  | GAGCCGGCATTTCATCTGAAT        | 738  |    |
| <i>hlyA</i> -CL-R                  | CTCAGCGGGCTAATACGGTTTA       |      | 9  |
| <i>hlyA</i> -ET-F                  | GGCAAACAGCGAAACAAATACC       | 481  |    |
| <i>hlyA</i> -ET-R                  | CTCAGCGGGCTAATACGGTTTA       |      |    |
| <i>mshA</i> -F                     | CGCACAATGAGGTTCCGCAAG        | 512  | 13 |
| <i>mshA</i> -R                     | CCGAAAATTGACCGCCATTATC       |      |    |
| <i>chxA</i> -F                     | TGTGTGATGATGCTTCTGG          | 2000 | 14 |

|               |                         |     |    |
|---------------|-------------------------|-----|----|
| <i>chxA-R</i> | TTATTTTCAGTTCATCTTTTCGC |     |    |
| <i>rtxA-F</i> | GGGATACAATGCCCTCTGGCA   | 977 |    |
| <i>rtxA-R</i> | TGGGTTGGCGGTTGGATTTTAC  |     | 15 |
| <i>rtxC-F</i> | CGACGAAGATCATTGACGAC    | 265 |    |
| <i>rtxC-R</i> | CATCGTCGTTATGTGGTTGC    |     |    |
| SXT-F         | TCGGGTATCGCCCAAGGGCA    | 986 | 16 |
| SXT-R         | GCGAAGATCATGCATAGACC    |     |    |
| MLST          |                         |     |    |
| <i>adk-F</i>  | CATCATTCTTCTCGGTGCTC    | 572 |    |
| <i>adk-R</i>  | AGTGCCGTCAAACCTCAGGTA   |     |    |
| <i>gyrB-F</i> | GTACGTTTCTGGCCTAGTGC    | 730 |    |
| <i>gyrB-R</i> | GGGTCTTTTTCTGACAATC     |     |    |
| <i>metE-F</i> | CGGGTGACTTTGCTTGGT      | 802 |    |
| <i>metE-R</i> | CAGATCGACTGGGCTGTG      |     |    |
| <i>mdh-F</i>  | ATGAAAGTCGCTGTTATTGG    | 794 | 17 |
| <i>mdh-R</i>  | TAGCTTGATAGGTTGGG       |     |    |
| <i>pntA-F</i> | GGCCAGCCCAAATCCT        | 739 |    |
| <i>pntA-R</i> | GATATTGCCGTCTTTTTCTT    |     |    |
| <i>purM-F</i> | GGTGTGCGATATTGATGCAGG   | 715 |    |
| <i>purM-R</i> | GGAATGTTTTCCAGAAGCC     |     |    |
| <i>pyrC-F</i> | ATCATGCCTAACACGGTTCC    | 709 |    |
| <i>pyrC-R</i> | TTCAAACACTTCGGCATA      |     |    |

---

#### References list

1. **Kumar P, Jain M, Goel AK, Bhadauria S, Sharma SK, Kamboj DV, Singh L, Ramamurthy T, Nair GB.** 2009. A large cholera outbreak due to a new cholera toxin variant of the *Vibrio cholerae* O1 El Tor biotype in Orissa, Eastern India. *J Med Microbiol* **58**:234-238.
2. **Davis, B. M., K. E. Moyer, et al.** (2000). "CTX prophages in classical biotype *Vibrio cholerae*: functional phage genes but dysfunctional phage genomes." *J Bacteriol* **182**(24): 6992-6998.
3. **Waldor MK, Mekalanos JJ.** 1996. Lysogenic conversion by a filamentous phage encoding cholera toxin. *Science* **272**:1910-1914.
4. **Davis BM, Kimsey HH, Chang W, Waldor MK.** 1999. The *Vibrio cholerae* O139 Calcutta bacteriophage CTXphi is infectious and encodes a novel repressor. *J Bacteriol* **181**:6779-6787.
5. **Mukhopadhyay AK, Chakraborty S, Takeda Y, Nair GB, Berg DE.** 2001. Characterization of VPI pathogenicity island and CTXphi prophage in environmental strains of *Vibrio cholerae*. *J Bacteriol* **183**:4737-4746.

6. **Li M, Kotetishvili M, Chen Y, Sozhamannan S.** 2003. Comparative genomic analyses of the vibrio pathogenicity island and cholera toxin prophage regions in nonepidemic serogroup strains of *Vibrio cholerae*. *Appl Environ Microbiol* **69**:1728-1738.
7. **Maiti D, Das B, Saha A, Nandy RK, Nair GB, Bhadra RK.** 2006. Genetic organization of pre-CTX and CTX prophages in the genome of an environmental *Vibrio cholerae* non-O1, non-O139 strain. *Microbiology* **152**:3633-3641.
8. **Wang D, Wang X, Li B, Deng X, Tan H, Diao B, Chen J, Ke B, Zhong H, Zhou H, Ke C, Kan B.** 2014. High prevalence and diversity of pre-CTXΦ alleles in the environmental *Vibrio cholerae* O1 and O139 strains in the Zhujiang River estuary. *Environmental Microbiology Reports* **Article first published online: 5 DEC 2013, DOI: 10.1111/1758-2229.12121.**
9. **Rivera IN, Chun J, Huq A, Sack RB, Colwell RR.** 2001. Genotypes associated with virulence in environmental isolates of *Vibrio cholerae*. *Appl Environ Microbiol* **67**:2421-2429.
10. **O'Shea YA, Reen FJ, Quirke AM, Boyd EF.** 2004. Evolutionary genetic analysis of the emergence of epidemic *Vibrio cholerae* isolates on the basis of comparative nucleotide sequence analysis and multilocus virulence gene profiles. *J Clin Microbiol* **42**:4657-4671.
11. **Chatterjee S, Ghosh K, Raychoudhuri A, Chowdhury G, Bhattacharya MK, Mukhopadhyay AK, Ramamurthy T, Bhattacharya SK, Klose KE, Nandy RK.** 2009. Incidence, virulence factors, and clonality among clinical strains of non-O1, non-O139 *Vibrio cholerae* isolates from hospitalized diarrheal patients in Kolkata, India. *J Clin Microbiol* **47**:1087-1095.
12. **Jagadeeshan S, Kumar P, Abraham WP, Thomas S.** 2009. Multiresistant *Vibrio cholerae* non-O1/non-O139 from waters in South India: resistance patterns and virulence-associated gene profiles. *J Basic Microbiol* **49**:538-544.
13. **Singh DV, Matte MH, Matte GR, Jiang S, Sabeena F, Shukla BN, Sanyal SC, Huq A, Colwell RR.** 2001. Molecular analysis of *Vibrio cholerae* O1, O139, non-O1, and non-O139 strains: clonal relationships between clinical and environmental isolates. *Appl Environ Microbiol* **67**:910-921.
14. **Awasthi SP, Asakura M, Chowdhury N, Neogi SB, Hinenoya A, Golbar HM, Yamate J, Arakawa E, Tada T, Ramamurthy T, Yamasaki S.** 2013. Novel cholix toxin variants, ADP-ribosylating toxins in *Vibrio cholerae* non-O1/non-O139 strains, and their pathogenicity. *Infect Immun* **81**:531-541.
15. **Chow KH, Ng TK, Yuen KY, Yam WC.** 2001. Detection of RTX toxin gene in *Vibrio cholerae* by PCR. *J Clin Microbiol* **39**:2594-2597.
16. **Bhanumathi R, Sabeena F, Isac SR, Shukla BN, Singh DV.** 2003. Molecular characterization of *Vibrio cholerae* O139 bengal isolated from water and the aquatic plant *Eichhornia crassipes* in the River Ganga, Varanasi, India. *Appl Environ Microbiol* **69**:2389-2394.
17. **Octavia S, Salim A, Kurniawan J, Lam C, Leung Q, Ahsan S, Reeves PR, Nair GB, Lan R.** 2013. Population structure and evolution of non-O1/non-O139 *Vibrio cholerae* by multilocus sequence typing. *PLoS One* **8**:e65342.

**Table S3.** Characterization of VSP-I/II clusters and their relationship with elements of CTX prophage and TCP genes

| No. of strain(s) | CTX prophage |             | TCP         |             | VSP-I  |        |        |        |        | VSP-II |        |        |        |        |        |        |        |
|------------------|--------------|-------------|-------------|-------------|--------|--------|--------|--------|--------|--------|--------|--------|--------|--------|--------|--------|--------|
|                  | <i>ctxB</i>  | <i>rstR</i> | <i>tcpA</i> | <i>tcpI</i> | VC0175 | VC0178 | VC0180 | VC0183 | VC0185 | VC0490 | VC0493 | VC0498 | VC0502 | VC0504 | VC0512 | VC0514 | VC0516 |
| 3                | -            | +           | +           | +           | -      | -      | -      | -      | -      | -      | -      | -      | -      | +      | -      | -      | -      |
| 5                | -            | +           | +           | +           | -      | -      | -      | -      | -      | -      | -      | -      | -      | -      | -      | -      | -      |
| 1                | +            | +           | -           | -           | -      | -      | -      | -      | -      | -      | -      | -      | -      | -      | -      | -      | -      |
| 1                | -            | +           | -           | -           | -      | -      | -      | -      | -      | -      | -      | -      | -      | -      | -      | -      | -      |
| 1                | -            | -           | -           | -           | -      | +      | -      | +      | +      | -      | -      | -      | -      | +      | -      | -      | -      |
| 1                | -            | -           | -           | -           | -      | -      | -      | -      | +      | -      | -      | -      | -      | +      | -      | -      | +      |
| 1                | -            | -           | -           | -           | -      | +      | -      | +      | +      | -      | -      | -      | -      | -      | -      | -      | -      |
| 1                | -            | -           | -           | -           | -      | -      | -      | -      | +      | -      | -      | -      | -      | -      | -      | -      | -      |
| 3                | -            | -           | -           | -           | -      | -      | -      | -      | -      | +      | +      | +      | +      | +      | +      | +      | +      |
| 2                | -            | -           | -           | -           | -      | -      | -      | -      | -      | +      | +      | +      | +      | +      | -      | +      | +      |
| 1                | -            | -           | -           | -           | -      | -      | -      | -      | -      | +      | +      | -      | -      | +      | -      | -      | +      |
| 1                | -            | -           | -           | -           | -      | -      | -      | -      | -      | +      | +      | -      | +      | -      | -      | +      | +      |
| 1                | -            | -           | -           | -           | -      | -      | -      | -      | -      | -      | -      | -      | -      | +      | -      | -      | -      |
| 1                | -            | -           | -           | -           | -      | -      | -      | -      | -      | -      | -      | -      | -      | +      | -      | -      | +      |

Table S4. Correlations of putative virulence genes and CTX prophage/TCP/VSP-I,II genes.

|             | <i>tcpA</i> | <i>ctxB</i> | <i>rstR</i> | VSP-I  | VSP-II | <i>rtxC</i> | TTSS   | SXT    | <i>chxA</i> | <i>mshA</i> | <i>rtxA</i> | ST     | IS1004 | <i>hlyA</i> |
|-------------|-------------|-------------|-------------|--------|--------|-------------|--------|--------|-------------|-------------|-------------|--------|--------|-------------|
| <i>tcpA</i> | 1           | -0.01       | .891**      | -0.02  | .257** | 0.056       | -0.024 | 0.103  | -0.019      | -0.066      | 0.076       | -0.033 | -0.051 | 0.037       |
|             | .           | 0.868       | 0           | 0.738  | 0      | 0.336       | 0.684  | 0.076  | 0.748       | 0.26        | 0.191       | 0.574  | 0.379  | 0.524       |
| <i>ctxB</i> | -0.01       | 1           | .311**      | -0.007 | -0.013 | 0.02        | -0.027 | -0.025 | -0.038      | 0.013       | 0.027       | -0.011 | 0.055  | 0.013       |
|             | 0.868       | .           | 0           | 0.907  | 0.824  | 0.737       | 0.641  | 0.672  | 0.512       | 0.83        | 0.648       | 0.844  | 0.346  | 0.824       |
| <i>rstR</i> | .891**      | .311**      | 1           | -0.022 | .222** | 0.001       | -0.039 | 0.077  | -0.042      | -.142*      | 0.036       | -0.037 | -0.048 | -0.046      |
|             | 0           | 0           | .           | 0.707  | 0      | 0.986       | 0.506  | 0.188  | 0.478       | 0.014       | 0.537       | 0.528  | 0.408  | 0.428       |
| VSP-I       | -0.02       | -0.007      | -0.022      | 1      | .250** | 0.039       | 0.098  | 0.032  | 0.051       | 0.025       | -0.024      | -0.023 | 0.052  | 0.026       |
|             | 0.738       | 0.907       | 0.707       | .      | 0      | 0.5         | 0.094  | 0.587  | 0.386       | 0.667       | 0.683       | 0.693  | 0.374  | 0.654       |
| VSP-II      | .257**      | -0.013      | .222**      | .250** | 1      | 0.022       | .228** | .127*  | -0.043      | -0.03       | 0.06        | -0.044 | .147*  | 0.05        |
|             | 0           | 0.824       | 0           | 0      | .      | 0.702       | 0      | 0.029  | 0.467       | 0.611       | 0.305       | 0.452  | 0.012  | 0.394       |
| <i>rtxC</i> | 0.056       | 0.02        | 0.001       | 0.039  | 0.022  | 1           | -0.018 | 0.08   | 0.075       | .256**      | .350**      | 0.066  | 0.087  | .558**      |
|             | 0.336       | 0.737       | 0.986       | 0.5    | 0.702  | .           | 0.76   | 0.169  | 0.202       | 0           | 0           | 0.257  | 0.137  | 0           |
| TTSS        | -0.024      | -0.027      | -0.039      | 0.098  | .228** | -0.018      | 1      | -0.076 | -0.038      | 0.057       | .167**      | 0.001  | .176** | 0.104       |
|             | 0.684       | 0.641       | 0.506       | 0.094  | 0      | 0.76        | .      | 0.194  | 0.513       | 0.325       | 0.004       | 0.985  | 0.002  | 0.073       |
| SXT         | 0.103       | -0.025      | 0.077       | 0.032  | .127*  | 0.08        | -0.076 | 1      | -0.032      | 0.045       | -0.005      | -0.083 | 0.004  | 0.095       |
|             | 0.076       | 0.672       | 0.188       | 0.587  | 0.029  | 0.169       | 0.194  | .      | 0.58        | 0.44        | 0.925       | 0.153  | 0.948  | 0.105       |
| <i>chxA</i> | -0.019      | -0.038      | -0.042      | 0.051  | -0.043 | 0.075       | -0.038 | -0.032 | 1           | .141*       | .261**      | -0.051 | .132*  | .147*       |
|             | 0.748       | 0.512       | 0.478       | 0.386  | 0.467  | 0.202       | 0.513  | 0.58   | .           | 0.015       | 0           | 0.379  | 0.023  | 0.012       |
| <i>mshA</i> | -0.066      | 0.013       | -.142*      | 0.025  | -0.03  | .256**      | 0.057  | 0.045  | .141*       | 1           | .208**      | 0.042  | 0.095  | .496**      |
|             | 0.26        | 0.83        | 0.014       | 0.667  | 0.611  | 0           | 0.325  | 0.44   | 0.015       | .           | 0           | 0.47   | 0.103  | 0           |
| <i>rtxA</i> | 0.076       | 0.027       | 0.036       | -0.024 | 0.06   | .350**      | .167** | -0.005 | .261**      | .208**      | 1           | 0.09   | .395** | .488**      |
|             | 0.191       | 0.648       | 0.537       | 0.683  | 0.305  | 0           | 0.004  | 0.925  | 0           | 0           | .           | 0.123  | 0      | 0           |
| ST          | -0.033      | -0.011      | -0.037      | -0.023 | -0.044 | 0.066       | 0.001  | -0.083 | -0.051      | 0.042       | 0.09        | 1      | -0.101 | 0.044       |
|             | 0.574       | 0.844       | 0.528       | 0.693  | 0.452  | 0.257       | 0.985  | 0.153  | 0.379       | 0.47        | 0.123       | .      | 0.083  | 0.452       |
| IS1004      | -0.051      | 0.055       | -0.048      | 0.052  | .147*  | 0.087       | .176** | 0.004  | .132*       | 0.095       | .395**      | -0.101 | 1      | .236**      |
|             | 0.379       | 0.346       | 0.408       | 0.374  | 0.012  | 0.137       | 0.002  | 0.948  | 0.023       | 0.103       | 0           | 0.083  | .      | 0           |
| <i>hlyA</i> | 0.037       | 0.013       | -0.046      | 0.026  | 0.05   | .558**      | 0.104  | 0.095  | .147*       | .496**      | .488**      | 0.044  | .236** | 1           |
|             | 0.524       | 0.824       | 0.428       | 0.654  | 0.394  | 0           | 0.073  | 0.105  | 0.012       | 0           | 0           | 0.452  | 0      | .           |

Correlations (Spearman's rho, N=295); \*\*. Correlation is significant at the 0.01 level (2-tailed); \*. Correlation is significant at the 0.05 level (2-tailed).



Table S5 Characterization of putative accessory virulence genes and relationships with CTX prophage/TCP genes

| No. of strain(s) | <i>tcpA</i> | <i>ctxB</i> | <i>rstR</i> | VSP-I | VSP-II | <i>rtxC</i> | TTSS(vcsC2) | SXT | <i>chxA</i> | <i>mshA</i> | <i>rtxA</i> | ST | IS1004 | <i>hlyA</i> |
|------------------|-------------|-------------|-------------|-------|--------|-------------|-------------|-----|-------------|-------------|-------------|----|--------|-------------|
| 1                | +           | -           | +           | -     | +      | +           | -           | -   | +           | +           | +           | -  | +      | +           |
| 1                | +           | -           | +           | -     | +      | +           | -           | -   | -           | -           | +           | -  | +      | +           |
| 1                | +           | -           | +           | -     | +      | +           | -           | +   | -           | +           | +           | -  | -      | +           |
| 1                | +           | -           | +           | -     | -      | +           | +           | -   | +           | +           | +           | -  | -      | +           |
| 2                | +           | -           | +           | -     | -      | +           | -           | +   | -           | +           | +           | -  | -      | +           |
| 1                | +           | -           | +           | -     | -      | +           | -           | -   | -           | +           | +           | -  | -      | +           |
| 1                | +           | -           | +           | -     | -      | +           | -           | -   | -           | +           | +           | -  | +      | +           |
| 1                | -           | +           | +           | -     | -      | +           | -           | -   | -           | +           | +           | -  | +      | +           |
| 1                | -           | -           | +           | -     | -      | -           | -           | -   | -           | -           | -           | -  | -      | -           |
| 1                | -           | -           | -           | +     | +      | +           | +           | -   | -           | +           | +           | -  | +      | +           |
| 1                | -           | -           | -           | +     | +      | +           | -           | +   | -           | +           | -           | -  | -      | +           |
| 1                | -           | -           | -           | +     | -      | +           | +           | -   | +           | +           | +           | -  | +      | +           |
| 1                | -           | -           | -           | +     | -      | +           | -           | -   | +           | +           | +           | -  | +      | +           |
| 2                | -           | -           | -           | -     | +      | +           | +           | +   | -           | +           | +           | -  | +      | +           |
| 1                | -           | -           | -           | -     | +      | +           | +           | -   | +           | +           | +           | -  | +      | +           |
| 3                | -           | -           | -           | -     | +      | +           | +           | -   | -           | +           | +           | -  | +      | +           |
| 1                | -           | -           | -           | -     | +      | +           | -           | -   | -           | +           | +           | -  | +      | +           |
| 1                | -           | -           | -           | -     | +      | +           | -           | -   | +           | +           | +           | -  | +      | +           |
| 1                | -           | -           | -           | -     | +      | -           | +           | +   | -           | +           | +           | -  | +      | +           |
| 1                | -           | -           | -           | -     | -      | -           | +           | +   | -           | +           | +           | -  | +      | +           |
| 1                | -           | -           | -           | -     | -      | -           | +           | -   | +           | +           | +           | -  | -      | +           |
| 1                | -           | -           | -           | -     | -      | -           | +           | -   | -           | +           | +           | -  | -      | +           |
| 2                | -           | -           | -           | -     | -      | -           | +           | -   | -           | +           | -           | -  | +      | +           |
| 4                | -           | -           | -           | -     | -      | -           | -           | -   | +           | +           | +           | -  | +      | +           |
| 1                | -           | -           | -           | -     | -      | -           | -           | -   | +           | +           | +           | -  | -      | +           |
| 2                | -           | -           | -           | -     | -      | -           | -           | -   | -           | +           | +           | -  | +      | +           |
| 2                | -           | -           | -           | -     | -      | -           | -           | -   | -           | +           | +           | -  | -      | +           |
| 2                | -           | -           | -           | -     | -      | -           | -           | -   | -           | +           | -           | -  | +      | +           |
| 1                | -           | -           | -           | -     | -      | -           | -           | -   | -           | +           | -           | -  | -      | +           |
| 6                | -           | -           | -           | -     | -      | -           | -           | -   | -           | +           | -           | -  | -      | -           |
| 5                | -           | -           | -           | -     | -      | -           | -           | -   | -           | -           | -           | -  | -      | -           |
| 1                | -           | -           | -           | -     | -      | +           | +           | +   | -           | +           | +           | -  | +      | +           |
| 1                | -           | -           | -           | -     | -      | +           | +           | -   | +           | +           | +           | +  | +      | +           |
| 6                | -           | -           | -           | -     | -      | +           | +           | -   | +           | +           | +           | -  | +      | +           |
| 3                | -           | -           | -           | -     | -      | +           | +           | -   | +           | +           | +           | -  | -      | +           |
| 1                | -           | -           | -           | -     | -      | +           | +           | -   | -           | +           | +           | +  | -      | +           |
| 17               | -           | -           | -           | -     | -      | +           | +           | -   | -           | +           | +           | -  | +      | +           |
| 8                | -           | -           | -           | -     | -      | +           | +           | -   | -           | +           | +           | -  | -      | +           |
| 1                | -           | -           | -           | -     | -      | +           | +           | -   | -           | -           | +           | -  | +      | +           |
| 8                | -           | -           | -           | -     | -      | +           | -           | +   | +           | +           | +           | -  | +      | +           |
| 3                | -           | -           | -           | -     | -      | +           | -           | +   | +           | +           | +           | -  | -      | +           |
| 1                | -           | -           | -           | -     | -      | +           | -           | +   | +           | +           | -           | -  | -      | +           |
| 10               | -           | -           | -           | -     | -      | +           | -           | +   | -           | +           | +           | -  | +      | +           |
| 7                | -           | -           | -           | -     | -      | +           | -           | +   | -           | +           | +           | -  | -      | +           |
| 1                | -           | -           | -           | -     | -      | +           | -           | +   | -           | +           | -           | -  | +      | +           |
| 5                | -           | -           | -           | -     | -      | +           | -           | +   | -           | +           | -           | -  | -      | +           |
| 1                | -           | -           | -           | -     | -      | +           | -           | +   | -           | -           | +           | -  | -      | +           |
| 1                | -           | -           | -           | -     | -      | +           | -           | -   | +           | +           | +           | +  | -      | +           |

|    |   |   |   |   |   |   |   |   |   |   |   |   |   |   |
|----|---|---|---|---|---|---|---|---|---|---|---|---|---|---|
| 32 | - | - | - | - | - | + | - | - | + | + | + | - | + | + |
| 1  | - | - | - | - | - | + | - | - | + | + | - | - | - | + |
| 21 | - | - | - | - | - | + | - | - | + | + | + | - | - | + |
| 2  | - | - | - | - | - | + | - | - | - | + | + | + | + | + |
| 6  | - | - | - | - | - | + | - | - | - | + | + | + | - | + |
| 48 | - | - | - | - | - | + | - | - | - | + | + | - | + | + |
| 31 | - | - | - | - | - | + | - | - | - | + | + | - | - | + |
| 23 | - | - | - | - | - | + | - | - | - | + | - | - | - | + |
| 1  | - | - | - | - | - | + | - | - | - | + | - | - | - | - |
| 2  | - | - | - | - | - | + | - | - | - | - | + | - | + | + |
| 1  | - | - | - | - | - | + | - | - | - | - | + | - | - | + |
| 1  | - | - | - | - | - | + | - | - | - | - | - | - | - | - |

---

Table S6. Characteristics of virulence-associated genes and housekeeping genes from non-O1/O139 strains in this study

| Strain  | Serogroup | <i>tcpA</i> | <i>ctxB</i> | <i>rstR</i> | VSP-I | VSP-II | <i>rtxC</i> | TTSS | SXT | <i>chxA</i> | <i>mshA</i> | <i>rtxA</i> | ST | IS1004 | <i>hlyA</i> | <i>adk</i> | <i>gyrB</i> | <i>mdh</i> | <i>metE</i> | <i>pntA</i> | <i>purM</i> | <i>pyrC</i> |
|---------|-----------|-------------|-------------|-------------|-------|--------|-------------|------|-----|-------------|-------------|-------------|----|--------|-------------|------------|-------------|------------|-------------|-------------|-------------|-------------|
| ZJ193-1 | unknow    | -           | -           | -           | -     | -      | +           | -    | +   | +           | +           | +           | -  | +      | +           | 5          | 1           | 32         | 30          | 1           | 1           | 6           |
| ZJ194-1 | unknow    | -           | -           | -           | -     | -      | +           | -    | -   | +           | +           | +           | -  | +      | +           | 5          | 1           | 32         | 30          | 2           | 1           | 6           |
| ZJ197-1 | unknow    | -           | -           | -           | -     | -      | +           | -    | +   | -           | +           | -           | -  | +      | +           | 11         | 1           | 23         | 14          | 2           | 24          | 1           |
| ZJ198-2 | unknow    | -           | -           | -           | -     | -      | +           | -    | +   | +           | +           | +           | -  | +      | +           | 25         | 1           | 23         | 14          | 5           | 1           | 1           |
| ZJ199-1 | unknow    | -           | -           | -           | -     | +      | +           | +    | -   | +           | +           | +           | -  | +      | +           | 11         | 1           | 23         | 18          | 1           | 24          | 3           |
| ZJ203-1 | unknow    | -           | -           | -           | -     | -      | +           | -    | -   | -           | +           | +           | -  | +      | +           | 16         | 28          | 23         | 18          | 10          | 18          | 2           |
| ZJ205-1 | unknow    | -           | -           | -           | -     | -      | +           | -    | -   | +           | +           | +           | -  | -      | +           | 20         | 28          | 23         | 20          | 10          | 1           | 30          |
| ZJ209-1 | unknow    | -           | -           | -           | -     | -      | +           | -    | -   | -           | +           | +           | -  | -      | +           | 20         | 28          | 13         | 20          | 28          | 21          | 15          |
| ZJ217-2 | unknow    | +           | -           | +           | -     | -      | +           | +    | -   | +           | +           | +           | -  | -      | +           | 20         | 28          | 13         | 20          | 28          | 21          | 10          |
| ZJ221-1 | unknow    | -           | -           | -           | -     | -      | +           | +    | -   | -           | +           | +           | -  | +      | +           | 5          | 20          | 6          | 15          | 6           | 21          | 41          |
| ZJ227-3 | unknow    | +           | -           | +           | -     | +      | +           | -    | -   | +           | +           | +           | -  | +      | +           | 5          | 20          | 6          | 12          | 13          | 21          | 7           |
| ZJ229-1 | unknow    | -           | -           | -           | -     | -      | +           | -    | -   | +           | +           | +           | -  | +      | +           | 5          | 33          | 6          | 29          | 13          | 21          | 8           |
| ZJ231-1 | unknow    | -           | -           | -           | -     | -      | +           | -    | -   | +           | +           | +           | -  | +      | +           | 23         | 32          | 27         | 42          | 3           | 21          | 38          |
| ZJ234-1 | unknow    | +           | -           | +           | -     | +      | +           | -    | -   | -           | -           | +           | -  | +      | +           | 33         | 20          | 34         | 31          | 25          | 21          | 1           |
| ZJ341-1 | unknow    | -           | -           | -           | -     | -      | +           | +    | -   | +           | +           | +           | +  | +      | +           | 26         | 26          | 2          | 4           | 16          | 21          | 10          |
| ZJ345-1 | unknow    | -           | -           | -           | -     | +      | +           | -    | -   | -           | +           | +           | -  | +      | +           | 1          | 7           | 8          | 17          | 34          | 1           | 27          |
| ZJ349-1 | unknow    | -           | -           | -           | -     | -      | -           | -    | -   | +           | +           | +           | -  | -      | +           | 1          | 36          | 28         | 34          | 31          | 1           | 20          |
| ZJ351-2 | unknow    | -           | -           | -           | -     | -      | -           | +    | -   | +           | +           | +           | -  | -      | +           | 26         | 18          | 2          | 36          | 31          | 3           | 7           |
| ZJ356-1 | unknow    | -           | -           | -           | -     | -      | +           | -    | -   | +           | +           | +           | +  | -      | +           | 1          | 24          | 28         | 4           | 10          | 8           | 32          |
| ZJ419-1 | unknow    | -           | -           | -           | -     | -      | +           | -    | +   | +           | +           | +           | -  | -      | +           | 34         | 10          | 1          | 22          | 18          | 25          | 40          |
| ZJ421-1 | unknow    | -           | -           | -           | -     | +      | +           | -    | -   | +           | +           | +           | -  | +      | +           | 4          | 22          | 37         | 8           | 21          | 6           | 21          |
| ZJ186-3 | unknow    | -           | -           | -           | -     | -      | +           | -    | -   | -           | -           | +           | -  | -      | +           | 24         | 22          | 17         | 38          | 24          | 3           | 12          |
| ZJ191-1 | unknow    | -           | -           | -           | -     | -      | +           | -    | -   | -           | +           | +           | -  | +      | +           | 26         | 22          | 11         | 19          | 34          | 1           | 27          |
| ZJ269-2 | unknow    | -           | -           | -           | +     | +      | +           | +    | -   | -           | +           | +           | -  | +      | +           | 26         | 22          | 18         | 23          | 4           | 1           | 28          |

|         |        |   |   |   |   |   |   |   |   |   |   |   |   |   |   |    |    |    |    |    |    |    |
|---------|--------|---|---|---|---|---|---|---|---|---|---|---|---|---|---|----|----|----|----|----|----|----|
| ZJ278-1 | unknow | - | - | - | - | - | + | - | - | - | + | - | - | - | + | 2  | 40 | 28 | 23 | 28 | 8  | 15 |
| ZJ278-2 | unknow | - | - | - | + | + | + | - | + | - | + | - | - | - | + | 10 | 40 | 39 | 44 | 38 | 15 | 17 |
| ZJ279-1 | unknow | - | - | - | - | - | + | + | + | - | + | + | - | + | + | 32 | 40 | 35 | 14 | 5  | 18 | 1  |
| ZJ280-1 | unknow | - | - | - | + | - | + | + | - | + | + | + | - | + | + | 26 | 20 | 18 | 14 | 6  | 18 | 41 |
| ZJ282-1 | unknow | - | - | - | - | - | + | + | - | - | - | + | - | + | + | 15 | 6  | 18 | 14 | 15 | 8  | 12 |
| ZJ283-2 | unknow | - | - | - | - | - | + | - | - | - | + | + | - | - | + | 20 | 1  | 18 | 30 | 1  | 2  | 6  |
| ZJ287-2 | unknow | - | - | - | - | - | - | - | - | - | + | - | - | - | - | 1  | 28 | 18 | 28 | 10 | 2  | 2  |
| ZJ180-1 | unknow | - | - | - | - | - | + | - | - | - | + | + | + | + | + | 1  | 5  | 18 | 2  | 13 | 7  | 10 |
| ZJ184-1 | unknow | - | - | - | - | - | + | + | - | - | + | + | + | - | + | 1  | 1  | 18 | 30 | 1  | 19 | 5  |
| ZJ242-1 | unknow | - | - | - | - | - | + | - | - | + | + | + | - | + | + | 18 | 1  | 18 | 41 | 1  | 19 | 42 |
| ZJ243-1 | unknow | - | - | - | - | - | - | + | - | - | + | - | - | + | + | 24 | 1  | 9  | 41 | 1  | 19 | 42 |
| ZJ245-1 | unknow | - | - | - | - | - | + | - | - | - | + | + | - | + | + | 27 | 3  | 9  | 27 | 22 | 20 | 4  |
| ZJ247-1 | unknow | - | - | - | - | - | + | + | - | + | + | + | - | + | + | 27 | 3  | 9  | 28 | 10 | 20 | 2  |
| ZJ251-1 | unknow | - | - | - | - | - | + | - | - | - | + | + | + | - | + | 13 | 3  | 20 | 28 | 10 | 20 | 2  |
| ZJ252-1 | unknow | - | - | - | - | - | + | - | - | - | + | + | + | - | + | 14 | 19 | 1  | 37 | 9  | 20 | 38 |
| ZJ259-1 | unknow | + | - | + | - | + | + | - | + | - | + | + | - | - | + | 1  | 12 | 23 | 46 | 12 | 19 | 43 |
| ZJ260-2 | unknow | + | - | + | - | - | + | - | + | - | + | + | - | - | + | 13 | 20 | 16 | 31 | 25 | 19 | 1  |
| ZJ146-1 | unknow | - | - | - | - | - | + | - | - | - | - | + | - | + | + | 6  | 13 | 1  | 32 | 27 | 19 | 1  |
| ZJ147-1 | unknow | - | - | - | - | - | + | - | - | - | - | + | - | + | + | 29 | 4  | 7  | 35 | 17 | 19 | 36 |
| ZJ149-1 | unknow | - | - | - | - | - | + | - | - | + | + | + | - | + | + | 29 | 4  | 3  | 43 | 38 | 23 | 18 |
| ZJ150-1 | unknow | - | - | - | - | - | + | - | + | + | + | - | - | - | + | 32 | 38 | 35 | 43 | 36 | 18 | 24 |
| ZJ157-1 | unknow | - | - | - | - | - | - | - | - | - | + | + | - | - | + | 32 | 20 | 38 | 18 | 25 | 18 | 25 |
| ZJ158-2 | unknow | - | - | - | - | - | + | - | + | - | - | + | - | - | + | 31 | 4  | 38 | 18 | 17 | 18 | 36 |
| ZJ163-1 | unknow | - | - | - | - | - | + | - | + | - | + | + | - | - | + | 1  | 4  | 23 | 13 | 17 | 18 | 36 |
| ZJ172-1 | unknow | - | - | - | - | - | + | - | - | + | + | + | - | + | + | 28 | 16 | 23 | 21 | 16 | 4  | 36 |
| ZJ172-2 | unknow | - | - | - | - | - | - | - | - | - | + | - | - | - | - | 9  | 2  | 23 | 21 | 22 | 4  | 32 |
| ZJ301-1 | unknow | - | - | - | - | - | + | - | - | - | + | + | - | + | + | 13 | 9  | 23 | 33 | 1  | 12 | 36 |

|                      |          |   |   |   |   |   |   |   |   |   |   |   |   |   |   |    |    |    |    |    |    |    |
|----------------------|----------|---|---|---|---|---|---|---|---|---|---|---|---|---|---|----|----|----|----|----|----|----|
| ZJ302-2              | unknow   | - | - | - | - | - | + | - | - | - | + | + | - | + | + | 1  | 41 | 1  | 33 | 39 | 17 | 19 |
| ZJ258-1              | unknow   | - | - | - | - | - | - | - | - | - | - | - | - | - | - | 17 | 27 | 29 | 32 | 27 | 11 | 1  |
| MJ-34                | unknow   | - | - | + | - | - | - | - | - | - | - | - | - | - | - | 4  | 34 | 1  | 33 | 23 | 9  | 11 |
| MJ-36                | unknow   | - | - | - | - | - | + | - | - | - | + | + | - | + | + | 26 | 27 | 22 | 33 | 27 | 10 | 1  |
| MJ-50                | unknow   | - | - | - | - | - | + | - | - | + | + | + | - | + | + | 28 | 27 | 23 | 33 | 14 | 13 | 16 |
| MJ-51                | unknow   | + | - | + | - | - | + | - | - | - | + | + | - | + | + | 21 | 34 | 23 | 33 | 23 | 12 | 11 |
| YL823006             | unknow   | - | - | - | - | - | + | - | - | - | + | + | - | - | + | 20 | 37 | 15 | 47 | 37 | 2  | 23 |
| YL823014             | unknow   | - | - | - | - | - | + | + | - | - | + | + | - | + | + | 8  | 21 | 23 | 6  | 7  | 9  | 11 |
| YL823016             | unknow   | - | - | - | - | - | + | - | - | - | + | + | + | - | + | 26 | 21 | 24 | 15 | 7  | 5  | 39 |
| YL823018             | unknow   | - | - | - | - | - | + | - | - | - | + | + | + | - | + | 11 | 8  | 18 | 15 | 11 | 9  | 39 |
| YL823019             | unknow   | - | - | - | - | - | + | - | - | - | + | + | + | - | + | 22 | 8  | 9  | 15 | 11 | 2  | 39 |
| YL823033             | unknow   | - | - | + | - | + | + | + | - | - | + | + | - | + | + | 1  | 13 | 30 | 40 | 11 | 1  | 9  |
| YL823034             | unknow   | - | - | - | - | + | + | + | - | - | + | + | - | + | + | 32 | 13 | 38 | 40 | 8  | 1  | 9  |
| YL714013             | unknow   | - | - | - | - | - | + | + | - | + | + | + | - | - | + | 32 | 4  | 9  | 7  | 8  | 1  | 41 |
| YL0882807            | unknow   | - | - | - | - | - | + | - | + | - | + | - | - | - | + | 1  | 39 | 23 | 43 | 35 | 19 | 18 |
| YL0882811            | unknow   | - | - | - | - | + | + | + | + | - | + | + | - | + | + | 26 | 25 | 14 | 45 | 1  | 19 | 18 |
| YL0882828            | unknow   | - | - | - | - | - | - | + | - | - | + | - | - | + | + | 29 | 13 | 3  | 24 | 25 | 23 | 1  |
| YL0882830            | unknow   | - | - | - | - | + | + | + | + | - | + | + | - | + | + | 29 | 25 | 3  | 45 | 1  | 23 | 11 |
| SC2008               | unknow   | - | + | + | - | - | + | - | - | - | + | + | - | + | + | 13 | 31 | 3  | 3  | 19 | 3  | 43 |
| 2740-80              | O1       | + | - | - | - | - | + | + | - | - | + | - | + | - | + | 5  | 30 | 32 | 1  | 19 | 1  | 43 |
| NCTC_8457(ATCC14033) | O1       | - | - | - | - | - | + | + | + | - | + | - | + | - | + | 5  | 31 | 32 | 1  | 19 | 1  | 43 |
| 12129(1)             | O1 Inaba | - | - | - | - | - | + | + | - | - | + | - | + | - | + | 26 | 35 | 33 | 11 | 23 | 1  | 13 |
| TM_11079-80          | O1 Ogawa | - | - | - | - | - | + | + | - | - | + | - | + | - | + | 1  | 13 | 5  | 39 | 26 | 8  | 1  |
| Amazonia             | O1       | - | - | - | - | - | + | + | + | + | + | - | + | - | + | 1  | 13 | 5  | 39 | 26 | 8  | 1  |
| VC35                 | O1       | - | - | - | - | - | + | + | - | - | - | - | + | - | + | 1  | 13 | 5  | 32 | 27 | 8  | 13 |
| AM-19226             | O39      | - | - | - | - | - | + | - | - | - | + | - | + | - | + | 20 | 13 | 10 | 25 | 8  | 19 | 11 |
| G4222                | O1       | + | - | - | - | - | + | - | - | - | + | - | + | - | + | 5  | 30 | 32 | 1  | 19 | 1  | 43 |

|           |      |   |   |   |   |   |   |   |   |   |   |   |   |   |   |    |    |    |    |    |    |    |
|-----------|------|---|---|---|---|---|---|---|---|---|---|---|---|---|---|----|----|----|----|----|----|----|
| LMA3984-4 | O1   | + | - | - | - | - | + | - | - | - | + | - | + | - | + | 26 | 11 | 4  | 12 | 33 | 3  | 13 |
| M66-2     | O1   | + | - | - | - | - | + | - | - | - | + | - | + | - | + | 5  | 31 | 32 | 1  | 19 | 1  | 43 |
| MZO-2     | O14  | - | - | - | - | - | + | - | - | - | + | - | + | - | + | 20 | 26 | 21 | 9  | 34 | 22 | 26 |
| MZO-3     | O37  | - | - | - | - | + | + | - | - | - | + | - | + | - | + | 7  | 27 | 25 | 21 | 13 | 3  | 31 |
| N16961    | O1   | + | + | + | + | + | + | - | - | - | - | - | + | - | + | 5  | 31 | 32 | 1  | 19 | 1  | 36 |
| 4260B     | O139 | + | + | + | + | + | + | - | - | - | + | - | + | + | + | 5  | 31 | 32 | 1  | 19 | 1  | 36 |
| 116063    | O1   | - | - | - | - | - | - | - | - | - | - | - | + | - | + | 1  | 13 | 5  | 39 | 26 | 8  | 1  |
| EM-1676A  | O1   | - | - | - | - | - | + | - | - | - | - | - | + | - | + | 1  | 15 | 31 | 16 | 16 | 12 | 22 |
| NHCC-008D | O1   | - | - | - | - | - | + | - | + | - | - | - | + | - | + | 3  | 15 | 19 | 24 | 32 | 16 | 29 |
| O395      | O1   | + | + | - | + | + | - | - | - | - | + | - | + | + | + | 5  | 31 | 32 | 4  | 19 | 1  | 43 |
| PS15      | O106 | - | - | - | - | + | + | - | + | + | - | - | + | - | + | 12 | 17 | 12 | 5  | 30 | 12 | 14 |
| V51       | O141 | - | + | - | - | - | + | - | - | - | + | - | + | - | + | 19 | 23 | 36 | 26 | 29 | 12 | 33 |
| V52       | O37  | - | + | + | - | - | + | - | - | - | + | - | + | - | + | 5  | 31 | 32 | 10 | 20 | 1  | 10 |
| JS2005001 | O139 | - | - | - | - | - | + | - | - | - | + | - | - | - | - | 32 | 40 | 40 | 48 | 38 | 14 | 34 |
| JX2006101 | O139 | - | - | - | - | - | + | - | - | - | + | + | - | + | + | 1  | 13 | 26 | 32 | 27 | 8  | 1  |
| GD2002005 | O139 | + | - | - | + | + | + | - | + | - | + | + | - | + | + | 5  | 31 | 32 | 1  | 19 | 1  | 37 |
| GD2006058 | O139 | - | - | - | - | - | + | - | - | - | + | - | - | - | - | 32 | 40 | 40 | 48 | 38 | 14 | 15 |
| JX2001016 | O139 | - | - | - | - | - | + | - | - | - | + | - | - | - | - | 32 | 40 | 40 | 48 | 38 | 14 | 35 |
| JX2008029 | O139 | + | - | + | - | - | + | - | - | - | + | - | - | - | - | 32 | 29 | 40 | 48 | 38 | 14 | 35 |
| JX2008031 | O139 | - | - | - | - | - | + | - | - | - | + | - | - | - | - | 30 | 40 | 40 | 48 | 38 | 14 | 35 |
| JX2005004 | O139 | - | - | - | - | - | + | - | - | - | + | - | - | - | - | 32 | 31 | 40 | 48 | 38 | 15 | 35 |
